# Supplementary material for: Immunological features beyond CD4/CD8 ratio values in older individuals
Source: PubMed Central journal article supplement (PMC8202849; doi:10.18632/aging.203109), 2021-05-26
Supplement: aging-13-203109-s001.pdf [file aging-13-203109-s001.pdf]

**SUPPLEMENTARY FIGURE**

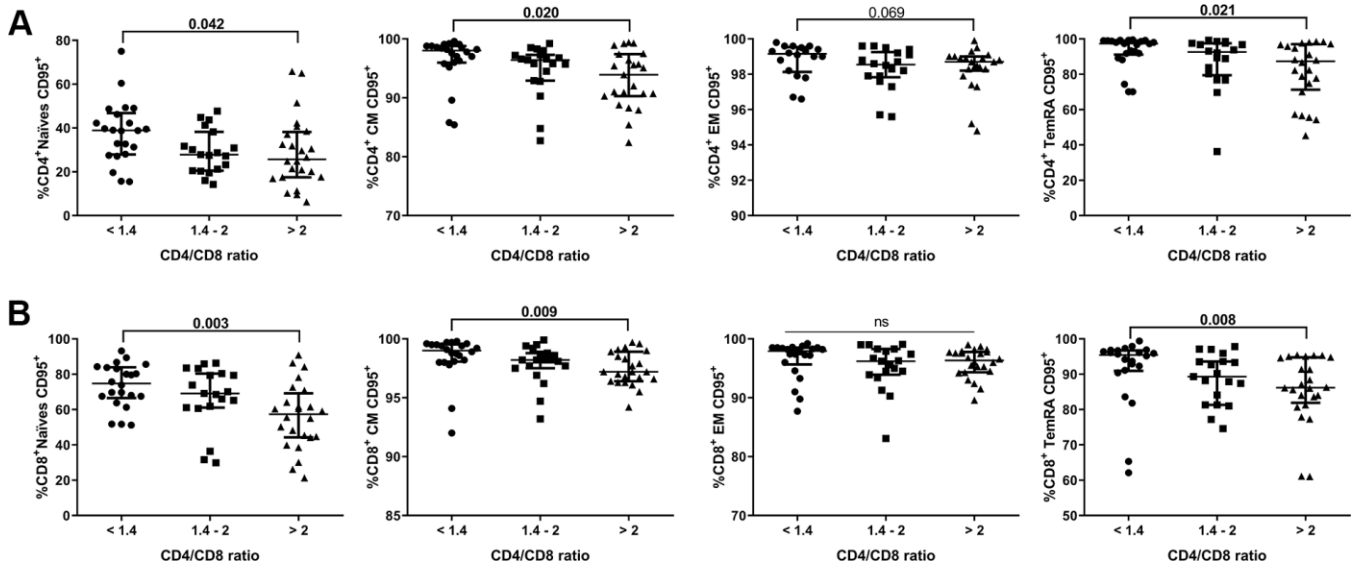

**Supplementary Figure 1.** Maturation subsets of CD4 (A) and CD8 (B) T-cells expressing the apoptosis-prone marker CD95 according to CD4/CD8 ratio. Comparisons between medians (IQR) with a p value <0.05 were considered statistically significant and are shown in bold. CM, central memory; EM, effector memory; TemRA, terminally differentiated effector memory.
